# Supplementary material for: High impact of the reducing agent on palladium nanomaterials: new insights from X-ray photoelectron spectroscopy and oxygen reduction reaction
Source: Royal Society of Chemistry journal article supplement (doi:10.1039/c5ra24829a), 2016-01-01
Supplement: c5ra24829a1.pdf [file c5ra24829a1.pdf]

**Electronic Supplementary Information (ESI) for**

**High impact of the reducing agent on palladium  
nanomaterials: New insights from X-ray photoelectron  
spectroscopy and oxygen reduction reaction**

Yaovi Holade,<sup>a</sup> Christine Canaff,<sup>a</sup> Suzie Poulin,<sup>a</sup> Têko W. Napporn,<sup>a\*</sup> Karine Servat<sup>a</sup> and K.  
Boniface Kokoh<sup>a</sup>

\*Corresponding author: [teko.napporn@univ-poitiers.fr](mailto:teko.napporn@univ-poitiers.fr)

# **1. Fundamentals of Oxygen Reduction Reaction in aqueous medium**

## **1.1. General concepts**

The oxygen reduction reaction (ORR) is effectively studied at an electrode material by some basic but fundamental relationships. Before starting any data analysis, it is important to understand these major gates. As emphasized by Jia and coworkers,<sup>1</sup> fundamental understanding of the ring rotation disc electrode (RRDE) theoretical basics and practical use is necessary to make appropriate use in an ORR study. The basic and current definitions and activity targets of ORR can be found in a review paper of Debe.<sup>2</sup> Depending of the medium, the ORR does not involve the same steps. Consequently, the whole reaction differs from the pH. In general, the overall reaction, which takes place in acidic medium, is described by Eq. (1) and involves the redox couple  $O_2/H_2O$ . Conversely, there is consumption of  $H_2O$  molecules in alkaline medium according to Eq. (2) and the involved redox couple is  $O_2/HO^-$ .

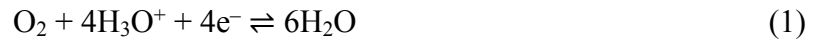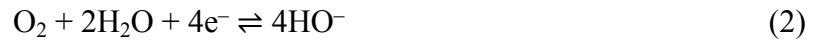

The Nernst equation is used to determine the equilibrium potential. Remember that, in this case, the potential is scaled with the Standard Hydrogen Electrode (SHE) and is calculated as following by Eq. (3) in acidic medium and Eq. (4) in alkaline medium:

$$E_{O_2/H_2O}/(V \text{ vs. SHE}) = E_{O_2/H_2O}^0 + \frac{RT}{4F} \ln \left\{ \frac{C_{O_2}}{C^0} \left( \frac{[H_3O^+]}{C^0} \right)^4 \right\} \quad (3)$$

$$E_{O_2/H_2O}/(V \text{ vs. SHE}) = E_{O_2/HO^-}^0 + \frac{RT}{4F} \ln \left\{ \frac{C_{O_2}}{C^0} \left( \frac{C^0}{[HO^-]} \right)^4 \right\} \quad (4)$$

- $C^0$ : reference molar concentration ( $= 10^{-3} \text{ mol cm}^{-3}$ ),
- $R$ : gas constant ( $8.314 \text{ J K}^{-1} \text{ mol}^{-1}$ ),
- $T$ : temperature in Kelvin ( $T = 273.15 + \theta$ , where  $\theta$  is the temperature in  $^{\circ}\text{C}$ ),
- $F$ : Faraday's constant ( $96485 \text{ C mol}^{-1}$ ),
- $C_{O_2}$ : oxygen solubility ( $\text{mol cm}^{-3}$ ),
- $[H_3O^+]$  is the  $H_3O^+$  concentration ( $\text{mol cm}^{-3}$ ),
- So,  $E_{O_2/H_2O}^0 = 1.229 \text{ V vs. SHE}$  is the standard equilibrium potential of  $O_2/H_2O$ ,
- So,  $E_{O_2/HO^-}^0 = 0.399 \text{ V vs. SHE}$  is the standard equilibrium potential of  $O_2/HO^-$ .

Please note that, SHE is a virtual reference electrode. It cannot be fabricated experimentally because it involves standard conditions (1 bar, pH = 0) at 273.15 K.<sup>3</sup> So, during ORR experiments, many reference electrodes are currently used.<sup>3-9</sup> Depending on the electrolytic medium (which induces the pH value, and chemical species constant change), it is more convenient to convert these values *versus* the Reversible Hydrogen Electrode (RHE). In the case of SHE, the conversion of the potential into RHE (Reversible Hydrogen Electrode) is describe by Eq. (5) in acid medium.

$$E_{O_2/H_2O}/(V \text{ vs. RHE}) = \left( E_{O_2/H_2O}^0 + \frac{RT}{4F} \ln \left[ \frac{C_{O_2}}{C^0} \left( \frac{[H_3O^+]}{C^0} \right)^4 \right] \right) - \left( E_{H^+/H_2}^0 + \frac{RT}{4F} \ln \left[ \left( \frac{[H_3O^+]}{C^0} \right)^4 \right] \right)$$

$$E_{O_2/H_2O}/(V \text{ vs. RHE}) = E_{O_2/H_2O}^0 + \frac{RT}{4F} \ln \left( \frac{C_{O_2}}{C^0} \right) \quad (5)$$

where  $E_{O_2/H_2O}^0 = 1.229 \text{ V vs. SHE}$  and  $E_{H^+/H_2}^0 = 0.000 \text{ V vs. SHE}$  at 25 °C.

From the water dissociation constant:  $K_e = [HO^-] \times [H_3O^+]$  and

$$E_{O_2/H_2O}/(V \text{ vs. RHE}) = \left( E_{O_2/HO^-}^0 + \frac{RT}{4F} \ln \left[ \frac{C_{O_2}}{C^0} \left( \frac{C^0}{[HO^-]} \right)^4 \right] \right) - \left( E_{H^+/H_2}^0 + \frac{RT}{4F} \ln \left[ \left( \frac{[H_3O^+]}{C^0} \right)^4 \right] \right)$$

the equilibrium potential must be evaluated according to Eq. (6) in alkaline medium.

$$E_{O_2/H_2O}/(V \text{ vs. RHE}) = E_{O_2/HO^-}^0 + \frac{RT}{4F} \ln \left( \frac{C_{O_2}}{K_e^4 C^0} \right) \quad (6)$$

where  $E_{O_2/HO^-}^0 = 0.399 \text{ V vs. SHE}$  at 25 °C.

All the important data involved in ORR results analysis are gathered in **Table S1**. It is obvious that any change of the experimental conditions induces a variation of the equilibrium potential ( $E_{eq}$ ).

**Table S1** Fundamental basic data of the ORR at 25-50 °C in different supporting electrolytes.

| <b>Electrolyte solution<br/>(25 °C, 1 atm)</b>                                                                                                                         | <b>E<sub>eq</sub><sup>[a]</sup><br/>(V vs. RHE)</b> | <b>D<sub>O2</sub><sup>[b]</sup><br/>(cm<sup>2</sup> s<sup>-1</sup>)</b> | <b>υ<sup>[b]</sup><br/>(cm<sup>2</sup> s<sup>-1</sup>)</b> | <b>C<sub>O2</sub><sup>[b]</sup><br/>(mol cm<sup>-3</sup>)</b> |
|------------------------------------------------------------------------------------------------------------------------------------------------------------------------|-----------------------------------------------------|-------------------------------------------------------------------------|------------------------------------------------------------|---------------------------------------------------------------|
| <b>0.5 M H<sub>2</sub>SO<sub>4</sub></b> (Refs. [10-14])                                                                                                               | 1.184                                               | 2.01×10 <sup>-5</sup>                                                   | 1.07×10 <sup>-2</sup>                                      | 1.03×10 <sup>-6</sup>                                         |
| <b>0.1 M HClO<sub>4</sub></b> (Refs. [10,12,15])                                                                                                                       | 1.185                                               | 1.93×10 <sup>-5</sup>                                                   | 1.01×10 <sup>-2</sup>                                      | 1.26×10 <sup>-6</sup>                                         |
| <b>0.1 M NaOH</b> (Refs. [12,14])                                                                                                                                      | 1.183                                               | 1.90×10 <sup>-5</sup>                                                   | 9.97×10 <sup>-3</sup>                                      | 8.35×10 <sup>-7</sup>                                         |
| <b>0.1 M KOH</b> (Refs. [12,14])                                                                                                                                       | 1.185                                               | 1.90×10 <sup>-5</sup>                                                   | 1.00×10 <sup>-2</sup>                                      | 1.2×10 <sup>-6</sup>                                          |
| [a]These values are calculated from Nernst-based equations: Eq. (5) and Eq. (6). [b]These data are those from the indicated literature references in the first column. |                                                     |                                                                         |                                                            |                                                               |

## 1.2. Data analysis through ORR equations

The ORR is described by Koutecky-Levich equation, Eq. (7).<sup>11,14,16</sup>

$$\frac{1}{j} = \frac{1}{j_l^{\text{diff}}} + \frac{1}{j_k^{\text{app}}} = \frac{1}{j_l^{\text{diff}}} + \left( \frac{1}{j_l^{\text{film}}} + \frac{1}{j_l^{\text{ads}}} + \frac{1}{j_0 \frac{\theta}{\theta_{\text{eq}}} e^{\frac{\eta}{b}}} \right) \quad (7)$$

with:

$$\begin{aligned} \frac{1}{j_L} &= \frac{1}{j_l^{\text{film}}} + \frac{1}{j_l^{\text{ads}}} \\ \frac{1}{j_k} &= \frac{1}{j_L} + \frac{1}{j_0 \frac{\theta}{\theta_{\text{eq}}} e^{\frac{\eta}{b}}} \\ j_k^{\text{app}} &= j_0 \frac{\theta}{\theta_{\text{eq}}} e^{\frac{\eta}{b}} \\ \eta &= E - E_{\text{eq}} \\ b &= \frac{RT}{\alpha n F} \\ j_l^{\text{diff}} &= 0.201 n F \nu^{-\frac{1}{6}} C_{\text{O}_2} D_{\text{O}_2}^{\frac{2}{3}} \Omega^{\frac{1}{2}} = n B \Omega^{\frac{1}{2}} \quad \text{where } B = 0.201 F \nu^{-\frac{1}{6}} C_{\text{O}_2} D_{\text{O}_2}^{\frac{2}{3}} \end{aligned} \quad (8)$$

- $j$ : ORR current density (mA·cm<sup>-2</sup>),
- $j_l^{\text{diff}}$ : diffusion limiting current density of O<sub>2</sub> in the bulk electrolyte (mA cm<sup>-2</sup>),
- $j_k$ : kinetic current density (mA·cm<sup>-2</sup>), free from the mass transport,

- $j_l^{\text{film}}$ : diffusion limiting current density of  $\text{O}_2$  inside the film composed of the catalytic ink ( $\text{mA}\cdot\text{cm}^{-2}$ ),
- $j_l^{\text{ads}}$ : diffusion limiting current density associated with the  $\text{O}_2$  adsorption at catalyst active site ( $\text{mA}\cdot\text{cm}^{-2}$ ),
- $j_0$ : exchange current density ( $\text{mA}\cdot\text{cm}^{-2}$ ),
- $n$ : exchange number of electrons,
- $b$ : Tafel slope (V),
- $\eta$  ( $= |E - E_{\text{eq}}|$ ), overpotential (V),
- $D_{\text{O}_2}$ : diffusion coefficient of  $\text{O}_2$  in solution ( $\text{cm}^2\cdot\text{s}^{-1}$ ),
- $C_{\text{O}_2}$ : the bulk concentration of  $\text{O}_2$  in the electrolyte ( $10^{-3} \text{ mol cm}^{-3}$ ),
- $\nu$ : kinematic viscosity of the electrolyte ( $\text{cm}^2\cdot\text{s}^{-1}$ ),
- $F$ : Faraday's constant ( $F = 96485 \text{ C}\cdot\text{mol}^{-1}$ ),
- $\Omega$ : RRDE speed (*rpm*).

In the electrode potential region where ORR is kinetically controlled by  $\text{O}_2$  diffusion, Eq. (8) indicates that plotting  $j_l^{\text{diff}}$  vs.  $\sqrt{\Omega}$  gives linear line and is known as “Levich plot”. In order to extract the data of interest from the ORR polarization curves using the RRDE, the following relationships are currently used, supposing  $\theta \approx \theta_{\text{eq}}$  that represent the degree of coverage of the platinum surface by oxygen containing adsorbed species at potential  $E$  and at the equilibrium potential  $E_{\text{eq}}$ , respectively:

$$\frac{1}{j_k} = \frac{1}{j_L} + \frac{1}{j_0 e^{\frac{\eta}{b}}} \Rightarrow \eta = b \ln \left( \frac{j_L}{j_0} \times \frac{j_k}{j_L - j_k} \right) \quad (9)$$

$$\frac{\partial \eta}{\partial \left( \log \left( \frac{j_k}{j_L - j_k} \right) \right)} = -b' = -b \times \ln(10) \approx -2.3 \frac{RT}{\alpha n F} \quad (10)$$

The curve  $\eta = f \left( \log \left( \frac{j_k}{j_L - j_k} \right) \right)$ , known as «Tafel plot» is a straight line characterized by a

Tafel slop  $\alpha_{\text{Tafel}} = -b' = \frac{\partial \eta}{\partial \left( \log \left( \frac{j_k}{j_L - j_k} \right) \right)}$  and the intercept  $\beta_{\text{Tafel}} = -b' \log \left( \frac{j_0}{j_L} \right)$ .

Thus,  $j_0$  is calculated from Eq. (11).

$$j_0 = 10^{-\frac{\beta_{\text{Tafel}}}{b'}} j_L \quad (11)$$

In practice, it is more convenient to use “ $b' = 2.3 \times b$ ” as Tafel plot (Eq. (9)) where  $\alpha$  is the symmetric factor, currently taken equal to 0.5. It is expressed in mV dec<sup>-1</sup>. And  $j_0$  must be compared to those from literature.<sup>10,11,17,18</sup> Overriding data from the ORR using RRDE apparatus concern the determination of the water formation efficiency at the disc,  $p(\text{H}_2\text{O})$ , in direct relationship with the amount of hydrogen peroxide ( $\text{H}_2\text{O}_2$ ) as reaction intermediate. The method was firstly developed by Jakobs *et al.*<sup>13</sup> in 1985 and then revised by Vork and Barendrecht in 1990.<sup>19</sup> Basically, each RRDE is characterized by its collection efficiency,  $N$  ( $0 < N < 1$ ). During the ORR,  $\text{O}_2$  is reduced at the disc (current:  $I_D < 0$ ) and the intermediate  $\text{H}_2\text{O}_2$  is radially swept outward away from the disk electrode and toward the ring electrode where it is oxidized to  $\text{O}_2$  ring (current:  $I_R > 0$ ). The set relationship is given by Eq. (12).<sup>19</sup> We draw reader's attention that even if  $N$  is provided in percentage, *e.g.* 20.5 % (herein), its value used in Eq. (12) is the fraction meaning 0.205. In alkaline medium, the intermediate is  $\text{HO}_2^-$ .

$$p(\text{H}_2\text{O}) = 1 - p(\text{H}_2\text{O}_2) = \frac{NI_D + I_R}{NI_D - I_R} = \frac{1 - \frac{I_R}{N|I_D|}}{1 + \frac{I_R}{N|I_D|}} \quad (12)$$

The  $\text{O}_2$  reduction to  $\text{H}_2\text{O}$  or  $\text{HO}^-$  involves  $4e^-$  and only  $2e^-$  when the reaction process leads to  $\text{H}_2\text{O}_2$  or  $\text{HO}_2^-$ . Thus, when both  $\text{H}_2\text{O}$  and  $\text{H}_2\text{O}_2$  are produced (acid medium), the number of electrons exchanged during the oxygen reduction,  $n_{\text{ex}}$ , is easily accessed through Eq. (13).<sup>13,19</sup>

$$n_{\text{ex}} = n_{(\text{O}_2 \rightarrow \text{H}_2\text{O})} + n_{(\text{O}_2 \rightarrow \text{H}_2\text{O}_2)} = 4p(\text{H}_2\text{O}) + 2p(\text{H}_2\text{O}_2) = 2[p(\text{H}_2\text{O}) + 1] = \frac{4N|I_D|}{N|I_D| + I_R} = \frac{4}{1 + \frac{I_R}{N|I_D|}} \leq 4 \quad (13)$$

As aforementioned, the collection efficiency is specific of the RRDE geometry and does not depend on the studied redox reaction.<sup>14,16,20</sup> It can also be experimentally measured using a simple reaction such as  $[\text{Fe}(\text{CN})_6]^{3-} + e^- \rightarrow [\text{Fe}(\text{CN})_6]^{4-}$ . It is calculated from Eq. (14)

$$N = -\frac{I_R}{I_D} = \frac{I_R}{|I_D|} \leq 1 \quad (14)$$

## 2. Additional Figures: Cyclic voltammetry

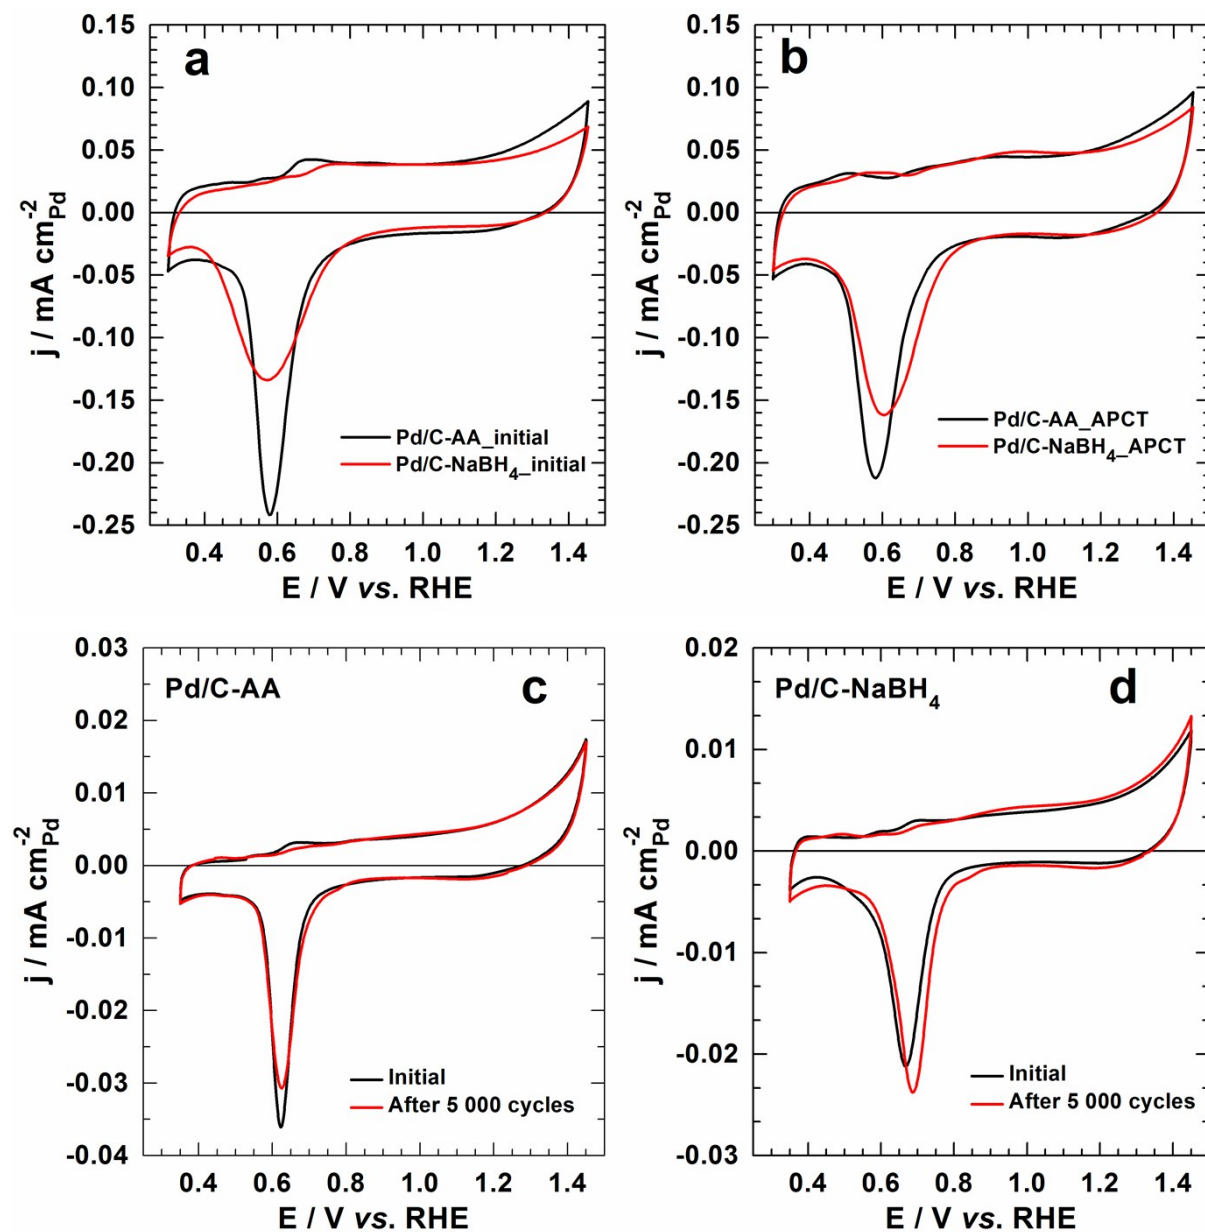

**Fig. S1** Cyclic voltammograms recorded in  $\text{N}_2$ -saturated  $0.1 \text{ mol L}^{-1} \text{ KOH}$  at  $50 \text{ mV s}^{-1}$  (**a, b**) and  $50 \text{ mV s}^{-1}$  (**c, d**) scan rates on Pd/C-AA and Pd/C-NaBH<sub>4</sub> electrode materials before and after the 5000 cycles of the accelerated potential cycling test (APCT) from 0.6 to 1 V vs. RHE at  $100 \text{ mV s}^{-1}$  scan rate in  $\text{O}_2$ -saturated  $0.1 \text{ mol L}^{-1} \text{ KOH}$ . APCT was performed by cycling the disc electrode potential from 0.6 to 1 V vs. RHE at  $100 \text{ mV s}^{-1}$  scan rate in  $\text{O}_2$ -saturated  $0.1 \text{ mol L}^{-1} \text{ KOH}$  solution.

### 3. Additional Figures: ORR experiments RRDE

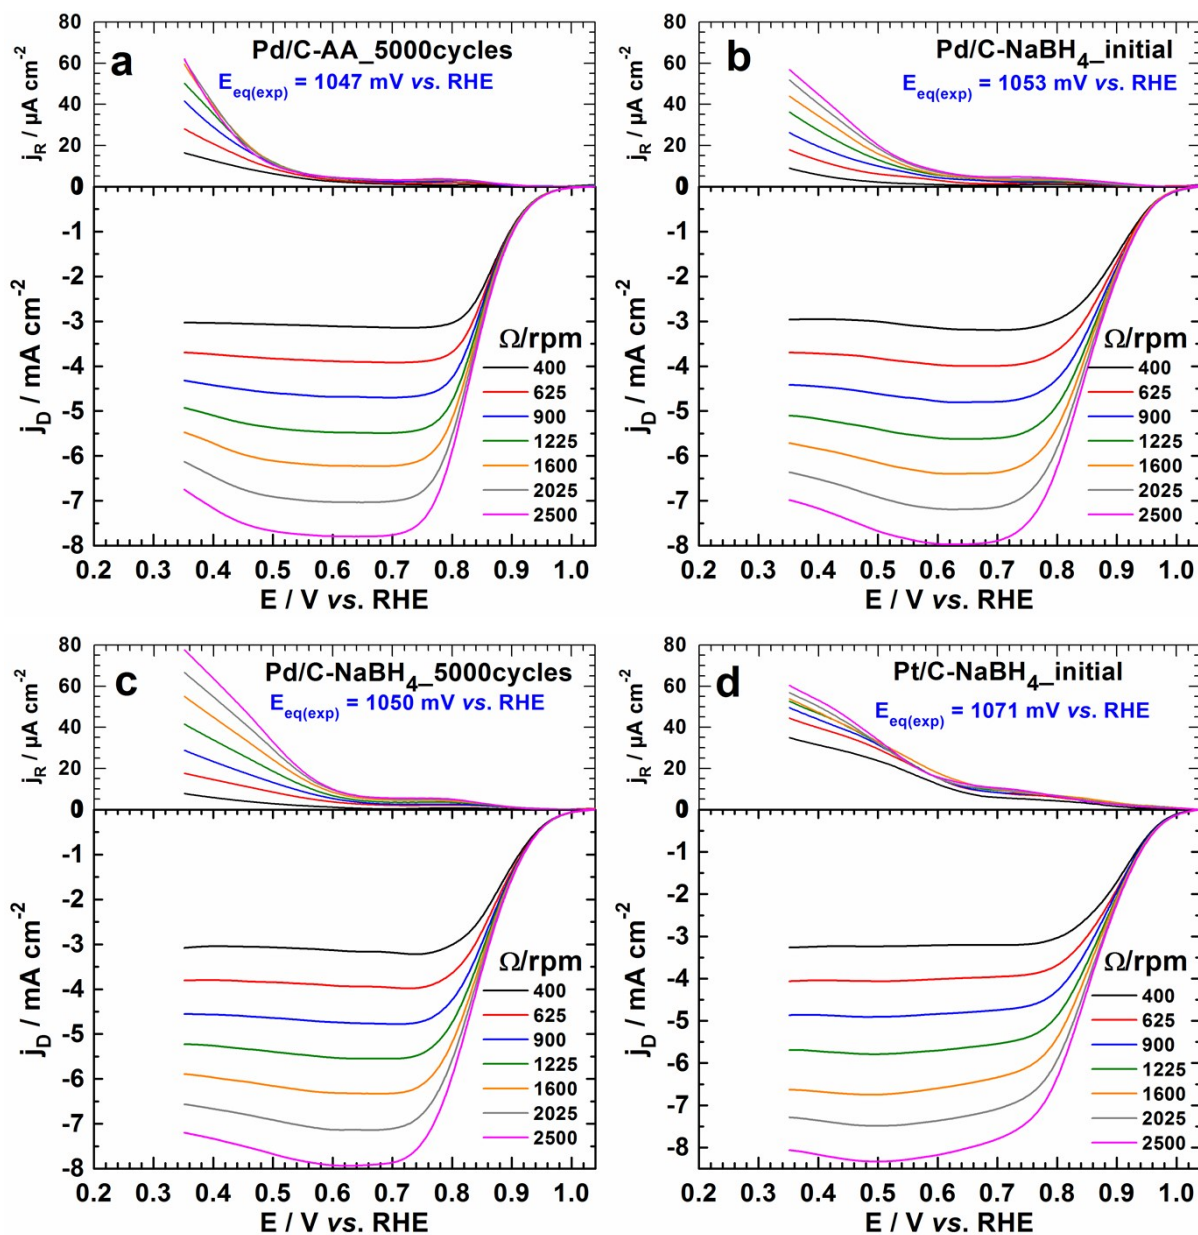

**Fig. S2** ORR polarization curves recorded in  $\text{O}_2$ -saturated  $0.1 \text{ mol L}^{-1}$  KOH solution at the ring (top) and disc (bottom) for  $5 \text{ mV s}^{-1}$  scan rate for different speeds of the RRDE. **(a)** Pd/C-AA electrode material after 5000 cycles of the accelerated potential cycling test (APCT). Pd/C-NaBH<sub>4</sub> electrode material before **(b)** and after 5000 cycles of APCT **(c)**. **(d)** Pt/C electrode material before 5000 cycles of APCT. For all panels, the current densities are obtained with the geometry surface area of the ring ( $0.11 \text{ cm}^2$ ) and disc ( $0.196 \text{ cm}^2$ ). APCT was performed by cycling the disc electrode potential from 0.6 to 1 V vs. RHE at  $100 \text{ mV s}^{-1}$  scan rate in  $\text{O}_2$ -saturated  $0.1 \text{ mol L}^{-1}$  KOH solution.



#### 4. Additional Figures: The Koutecky–Levich plots

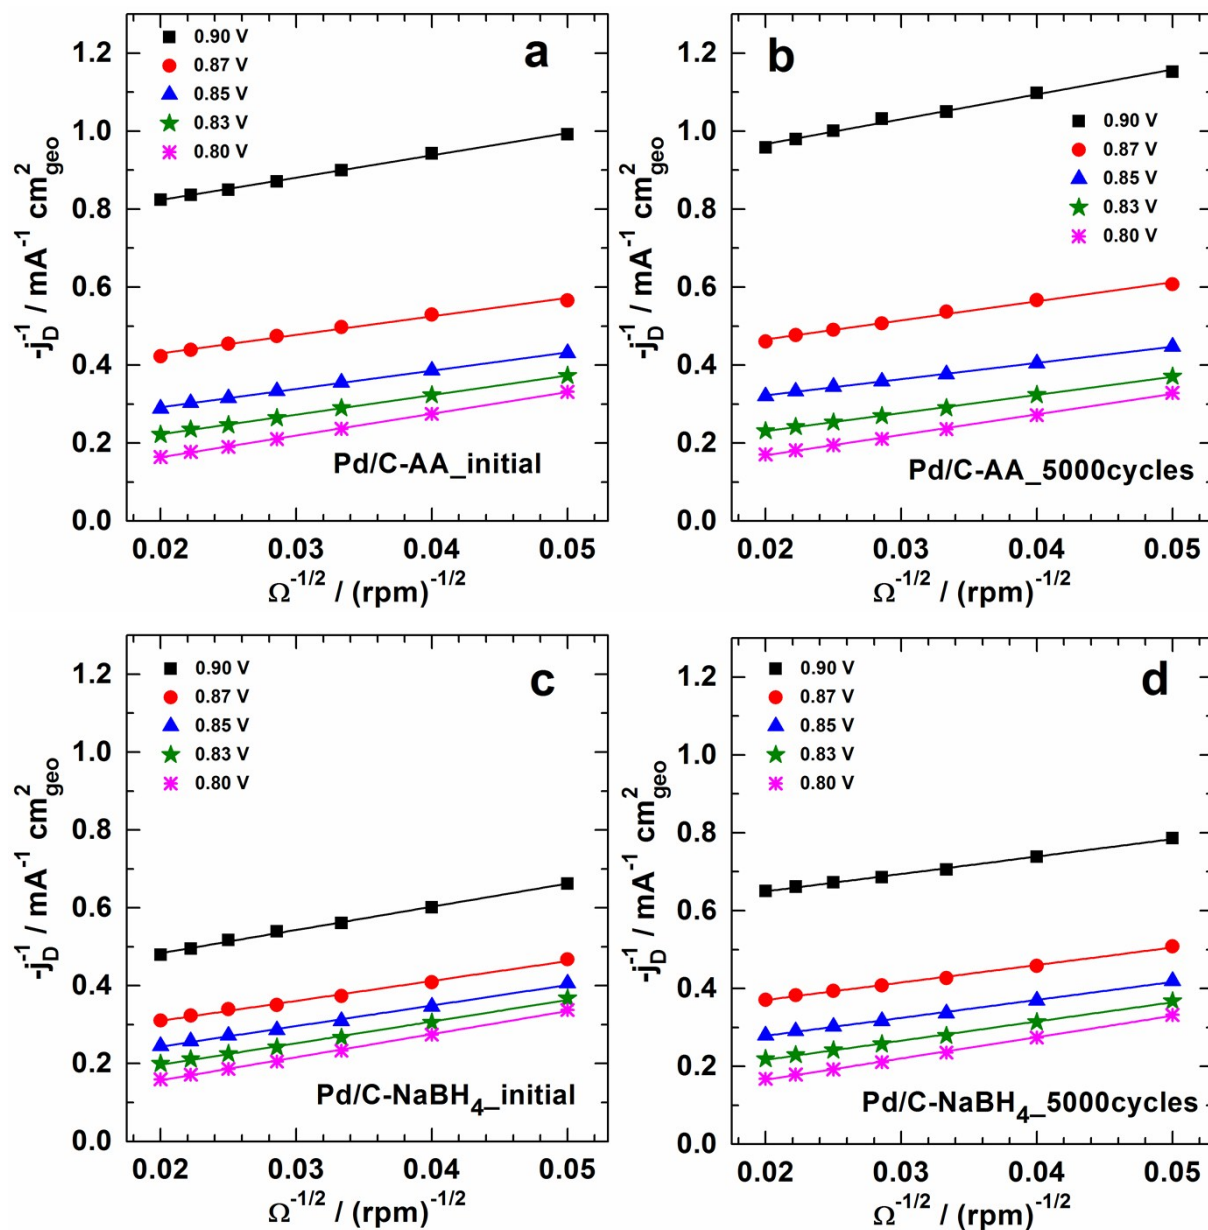

**Fig. S3** The Koutecky–Levich plots from the ORR polarization curves recorded at  $5 \text{ mV s}^{-1}$  scan rate; before (**a**, **c**) and after (**b**, **d**) the 5000 cycles of accelerated potential cycling test (APCT). For all panels, the current densities are obtained with the geometry surface area of the ring ( $0.11 \text{ cm}^2$ ) and disc ( $0.196 \text{ cm}^2$ ). APCT was performed by cycling the disc electrode potential from 0.6 to 1 V vs. RHE at  $100 \text{ mV s}^{-1}$  scan rate in  $\text{O}_2$ -saturated  $0.1 \text{ mol L}^{-1}$  KOH solution.

## 5. Additional Figures: Determination of the limiting current density

$j_L$

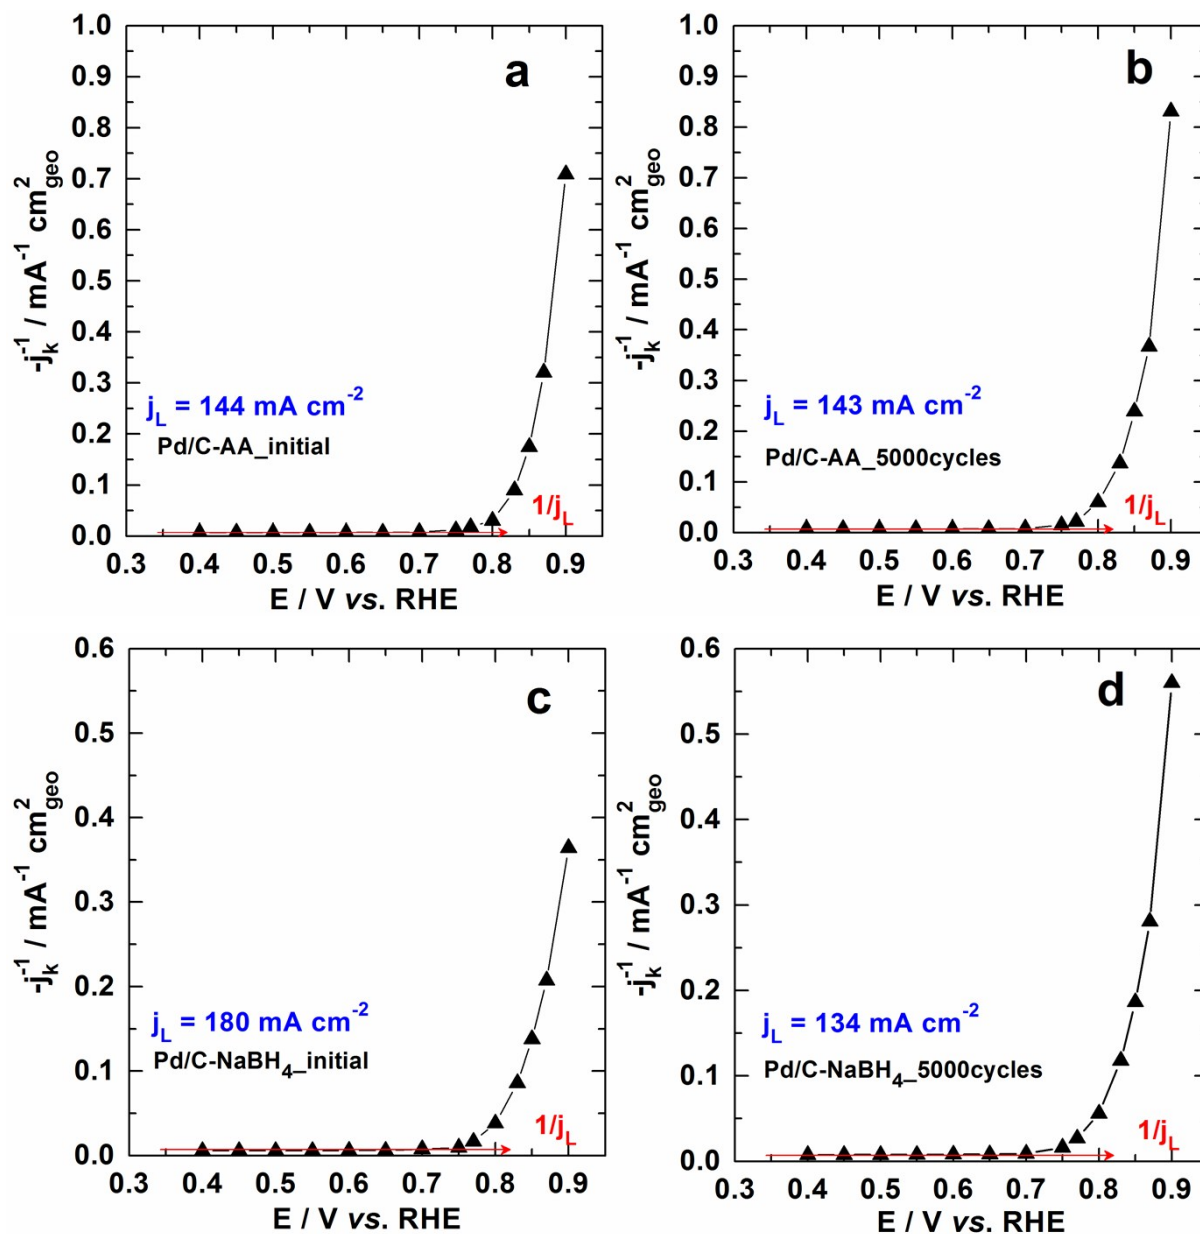

**Fig. S4** The “ $j_k^{-1}$  versus  $E$ ” plots for the determination of the limiting current density  $j_L$  before (a, c) and after (b, d) the 5000 cycles of accelerated potential cycling test (APCT). The obtained value is reported in each panel. Note:  $j_k$  is the kinetic current density, determined from the Koutecky–Levich plots and normalized with the geometry surface area of the disc ( $0.196 \text{ cm}^2$ ). APCT was performed by cycling the disc electrode potential from 0.6 to 1 V vs. RHE at  $100 \text{ mV s}^{-1}$  scan rate in  $\text{O}_2$ -saturated  $0.1 \text{ mol L}^{-1}$  KOH solution.

## References:

1. Z. Jia, G. Yin and J. Zhang, in *Rotating Electrode Methods and Oxygen Reduction Electrocatalysts*, eds. W. Xing, G. Yin and J. Zhang, Elsevier, Amsterdam, 2014, pp. 199-229.
2. M. K. Debe, *Nature*, 2012, **486**, 43-51.
3. T. Biegler and R. Woods, *J. Chem. Educ.*, 1973, **50**, 604-605.
4. R. Thacker, *J. Chem. Educ.*, 1968, **45**, 180.
5. R. Thacker, *Nature*, 1963, **198**, 179-179.
6. W. J. Hamer and D. N. Craig, *J. Electrochem. Soc.*, 1957, **104**, 206-211.
7. T. J. Gray and R. Eiss, *Nature*, 1962, **194**, 469-470.
8. J. Engelhardt, *J. Chem. Educ.*, 1968, **45**, 547.
9. R. D. Caton, *J. Chem. Educ.*, 1973, **50**, A571-A578.
10. C. Song and J. Zhang, in *PEM Fuel Cell Electrocatalysts and Catalyst Layers*, ed. J. Zhang, Springer-Verlag London, London, UK, 2008, pp. 89-134.
11. C. Coutanceau, M. J. Croissant, T. Napporn and C. Lamy, *Electrochim. Acta*, 2000, **46**, 579-588.
12. K. E. Gubbins and R. D. Walker, *J. Electrochem. Soc.*, 1965, **112**, 469-471.
13. R. C. M. Jakobs, L. J. J. Janssen and E. Barendrecht, *Electrochim. Acta*, 1985, **30**, 1085-1091.
14. W. Xing, G. Yin and J. Zhang, *Rotating Electrode Methods and Oxygen Reduction Electrocatalysts*, Elsevier Science and Technology, Poland, 2014.
15. D. Wang, H. L. Xin, R. Hovden, H. Wang, Y. Yu, D. A. Muller, F. J. DiSalvo and H. D. Abruña, *Nat. Mater.*, 2013, **12**, 81-87.
16. Allen J. Bard and L. R. Faulkner, *Electrochemical Methods: Fundamentals and Applications*, John Wiley & Son, Inc., USA, 2001.
17. J. X. Wang, N. M. Markovic and R. R. Adzic, *J. Phys. Chem. B*, 2004, **108**, 4127-4133.
18. C. Song, Y. Tang, J. L. Zhang, J. Zhang, H. Wang, J. Shen, S. McDermid, J. Li and P. Kozak, *Electrochim. Acta*, 2007, **52**, 2552-2561.
19. F. T. A. Vork and E. Barendrecht, *Electrochim. Acta*, 1990, **35**, 135-139.
20. Y. V. Pleskov and V. Y. Filinovskii, *The Rotating Disc Electrode*, Consultants Bureau, New York, USA, 1976.
